# Supplementary material
Source: PubMed Central journal article supplement (PMC6650161)
Supplement: NIHMS989101-supplement-Sup_Data.pdf [file NIHMS989101-supplement-Sup_Data.pdf]

# Contents – Supplemental Figures

|                                                             |           |
|-------------------------------------------------------------|-----------|
| <b>Supplemental Figures and Tables .....</b>                | <b>2</b>  |
| <b>Figure S1 .....</b>                                      | <b>2</b>  |
| <b>Figure S2 .....</b>                                      | <b>3</b>  |
| <b>Figure S3 .....</b>                                      | <b>4</b>  |
| <b>Figure S4 A .....</b>                                    | <b>5</b>  |
| <b>Figure S4 B .....</b>                                    | <b>6</b>  |
| <b>Figure S5 A .....</b>                                    | <b>7</b>  |
| <b>Figure S5 B .....</b>                                    | <b>8</b>  |
| <b>Statistical Analysis .....</b>                           | <b>9</b>  |
| <b>(Table S1) Mass Remaining Analysis (ANOVA).....</b>      | <b>9</b>  |
| <b>(Table S2) Porosity Analysis (ANOVA) .....</b>           | <b>11</b> |
| <b>(Table S3) Mean Pore Size Analysis (ANOVA).....</b>      | <b>13</b> |
| <b>(Table S4) Mode Pore Size Analysis (ANOVA).....</b>      | <b>15</b> |
| <b>(Table S5) Incubation Media pH Analysis (ANOVA).....</b> | <b>17</b> |

## Supplemental Figures and Tables

Figure S1

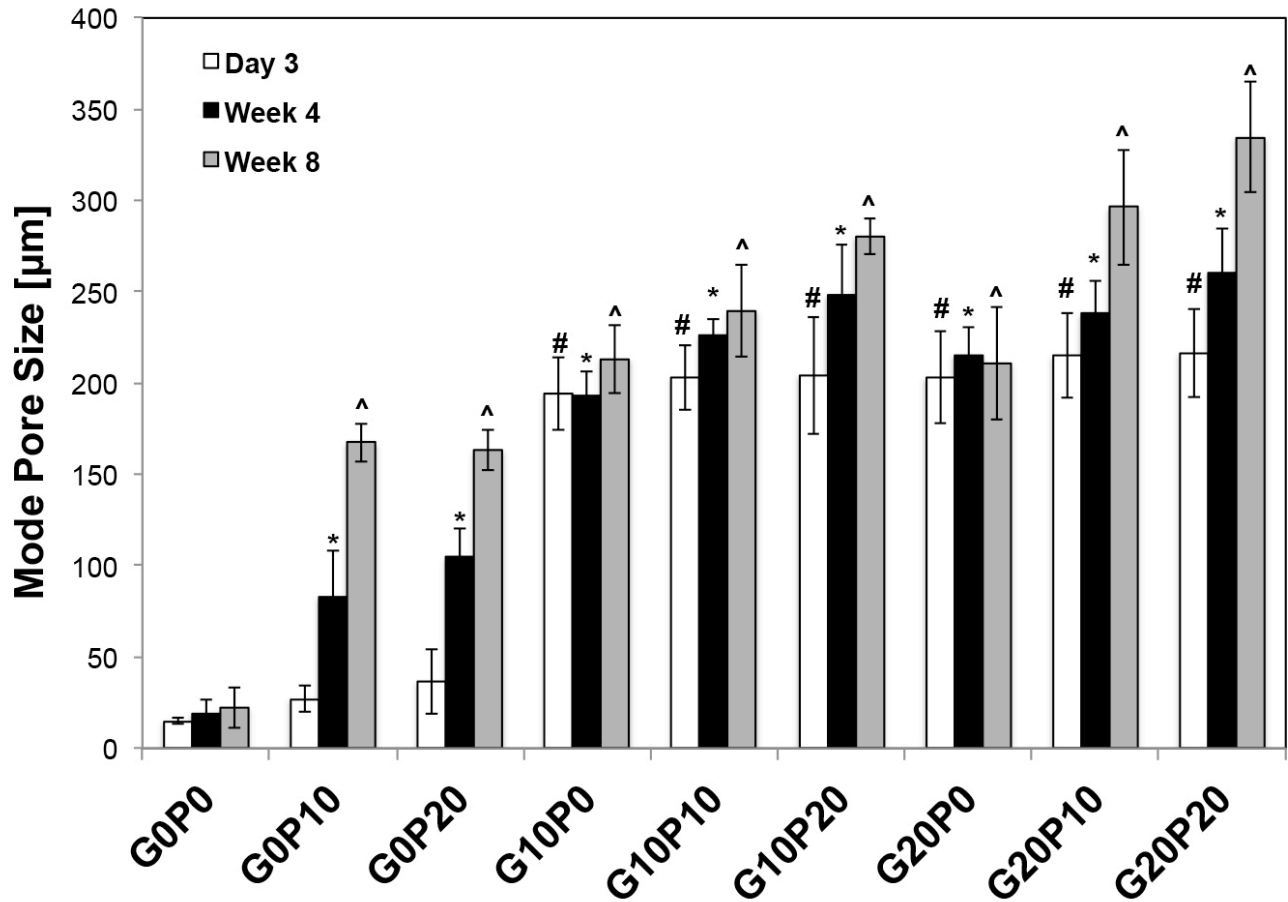

**Figure S1.** Mode pore size of the GMP/PLGA/CPC composites determined by microCT after being leached in PBS at 37°C for 3 days, 4 wks, and 8 wks. GMPs and PLGA MPs were introduced in three different weight fractions (0, 10, and 20%). Within the Day 3 series, # denotes significance with respect to the CPC control. In the Week 4 series, \* denotes significance with respect to the CPC control. In the Weeks 8 series, ^ denotes significance with respect to the control (n=3, p<0.05).

**Figure S2**

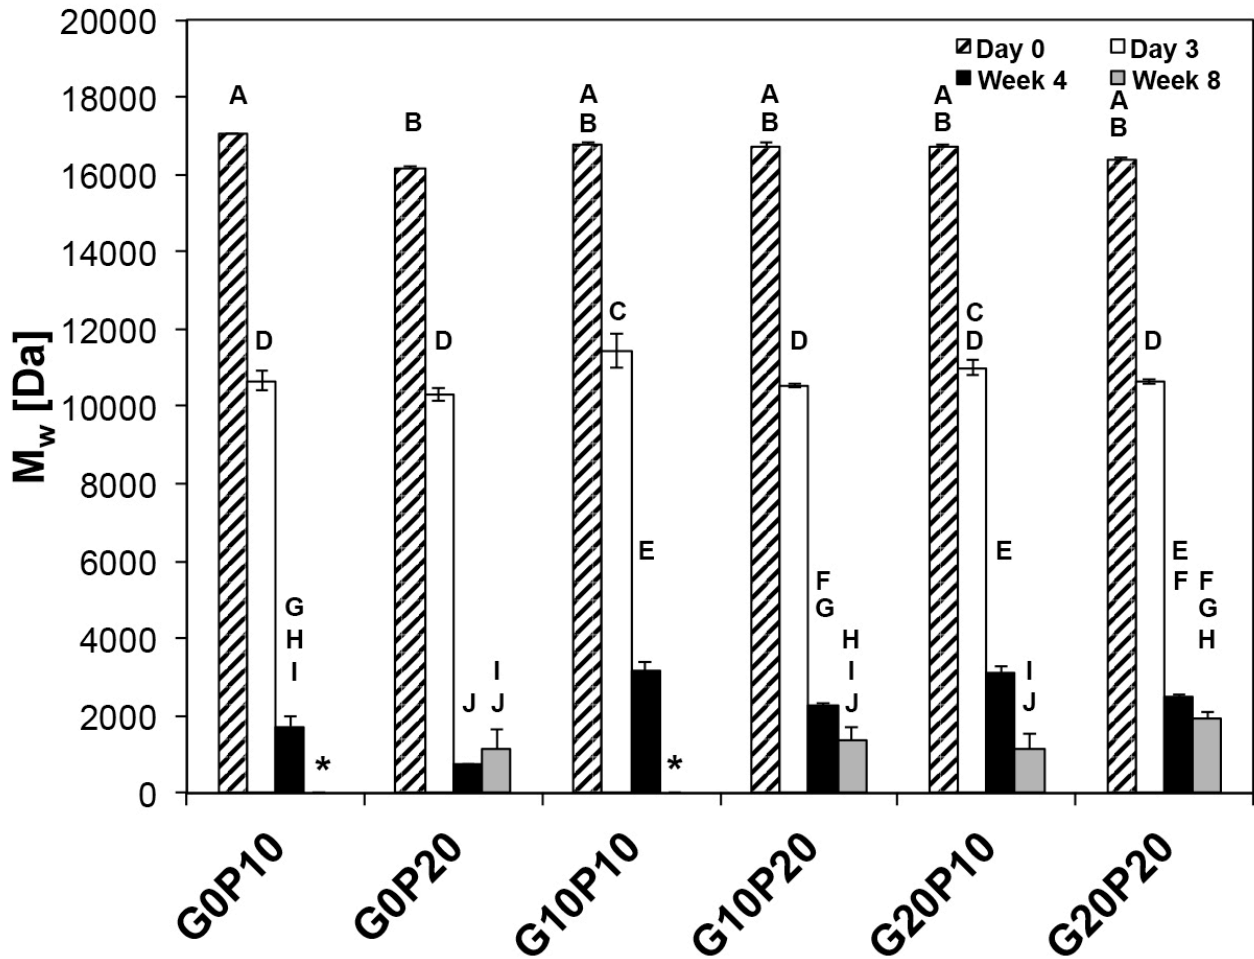

**Figure S2.** The molecular weight ( $M_w$ ) of the PLGA polymer inside CPC scaffolds evaluated by advanced polymer chromatography (APC) after fabrication (day 0) and after being leached in PBS at 37°C for 3 days, 4 wks, and 8 wks. GMPs and PLGA MPs were introduced in three different weight fractions (0, 10, and 20%). Those that do not share the same letter are statistically significantly different ( $p < 0.05$ ). At 8 wks, GOP10 and G10P10 (marked with an \*) could not be quantified due to chromatogram extending beyond that of the lowest standard (266 Da).

**Figure S3**

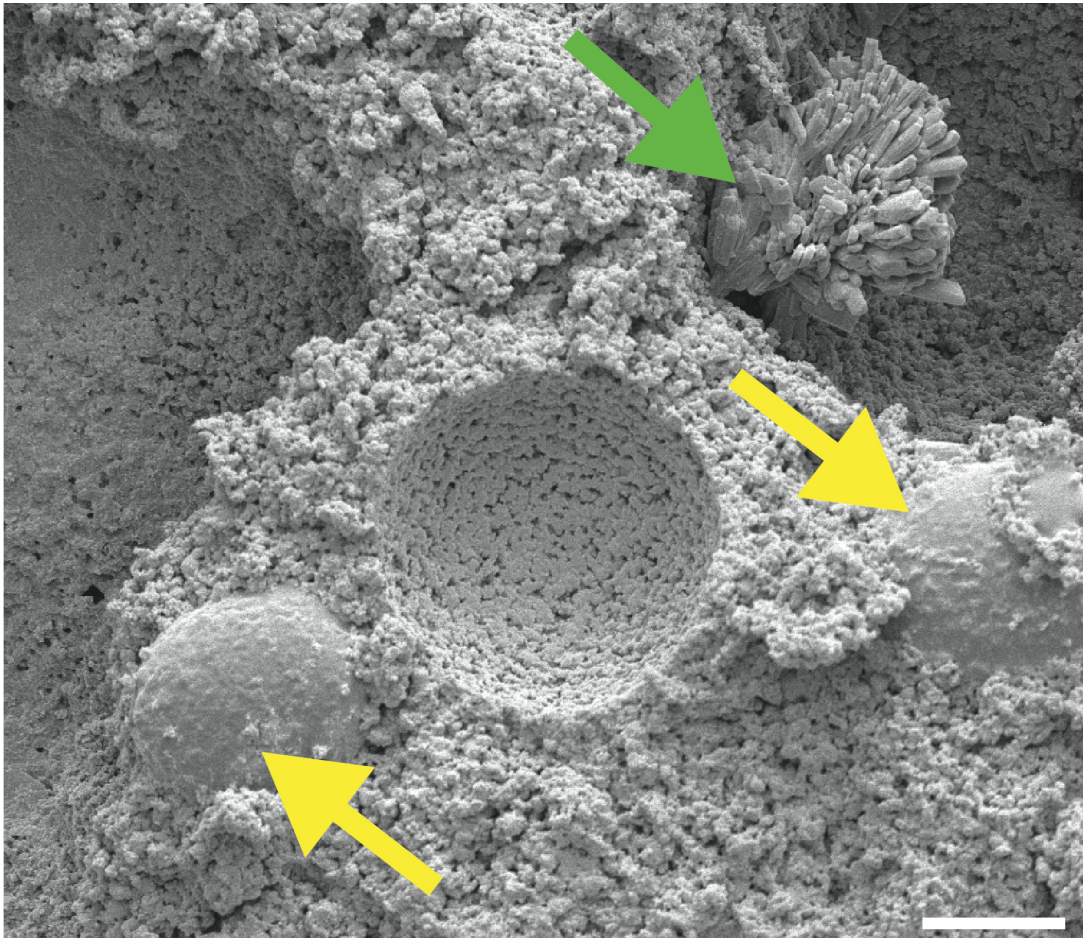

**Figure S3.** Representative scanning electron microscopy (SEM) images showing the internal morphology of composites upon fabrication (Day 0). The smooth spherical particles annotated by a yellow arrow represent PLGA MPs, while the jagged irregular particles marked with a green arrow represent GMPs. The white scale bar in the image represents 50  $\mu\text{m}$ .

*Figure S4 A*

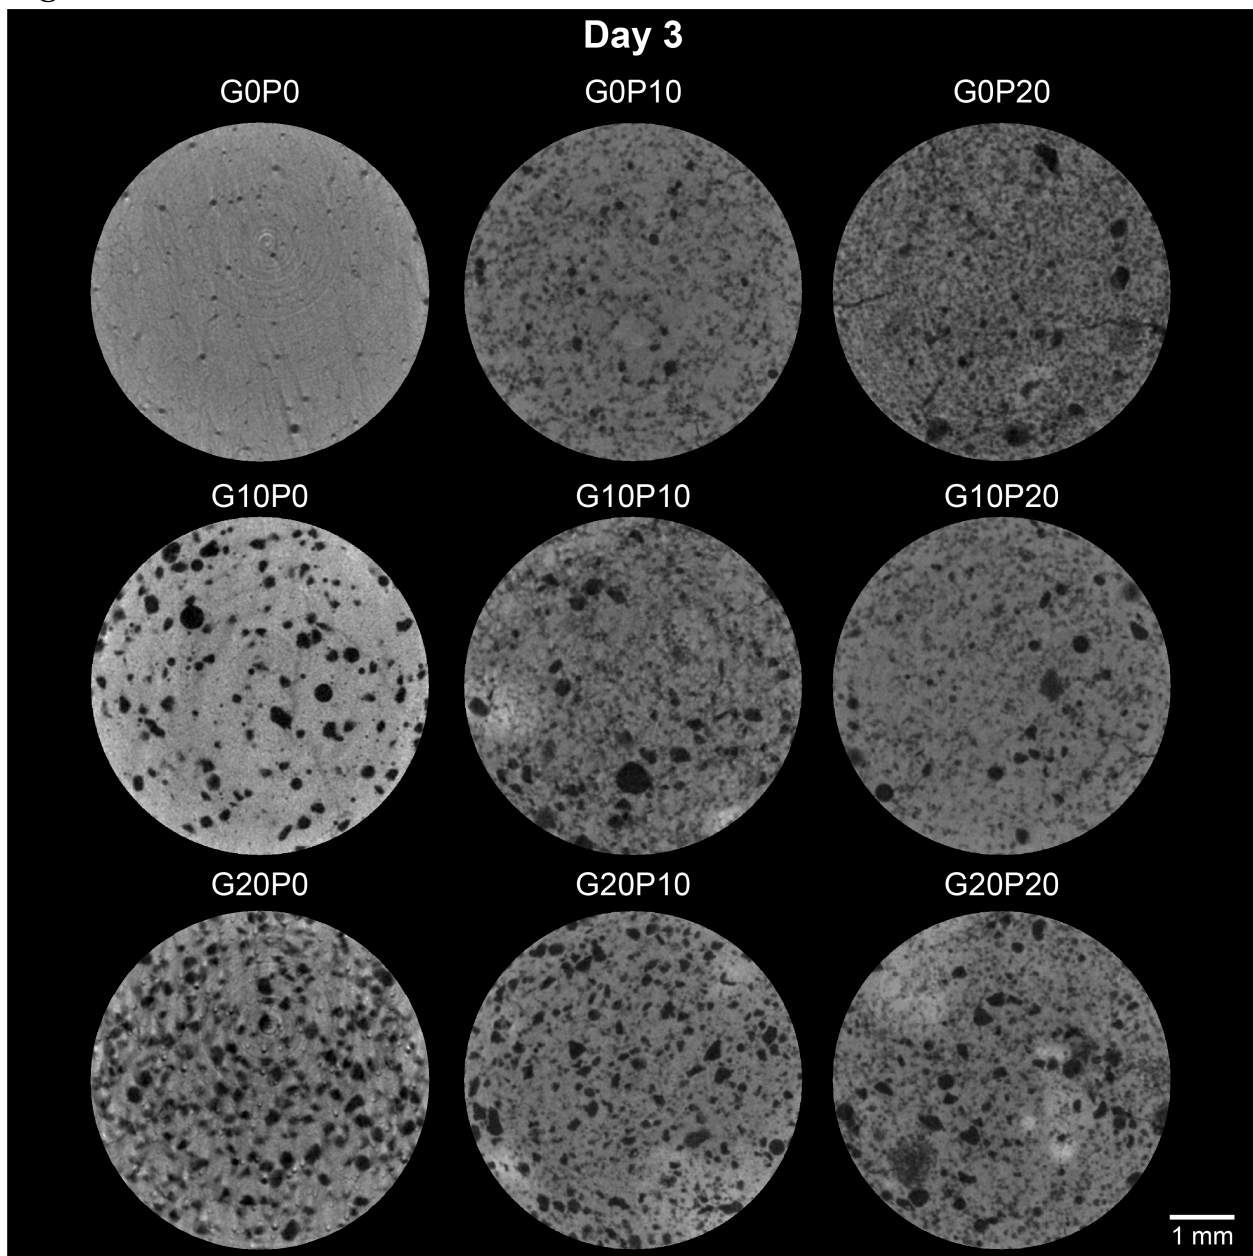

**Figure S4 B**

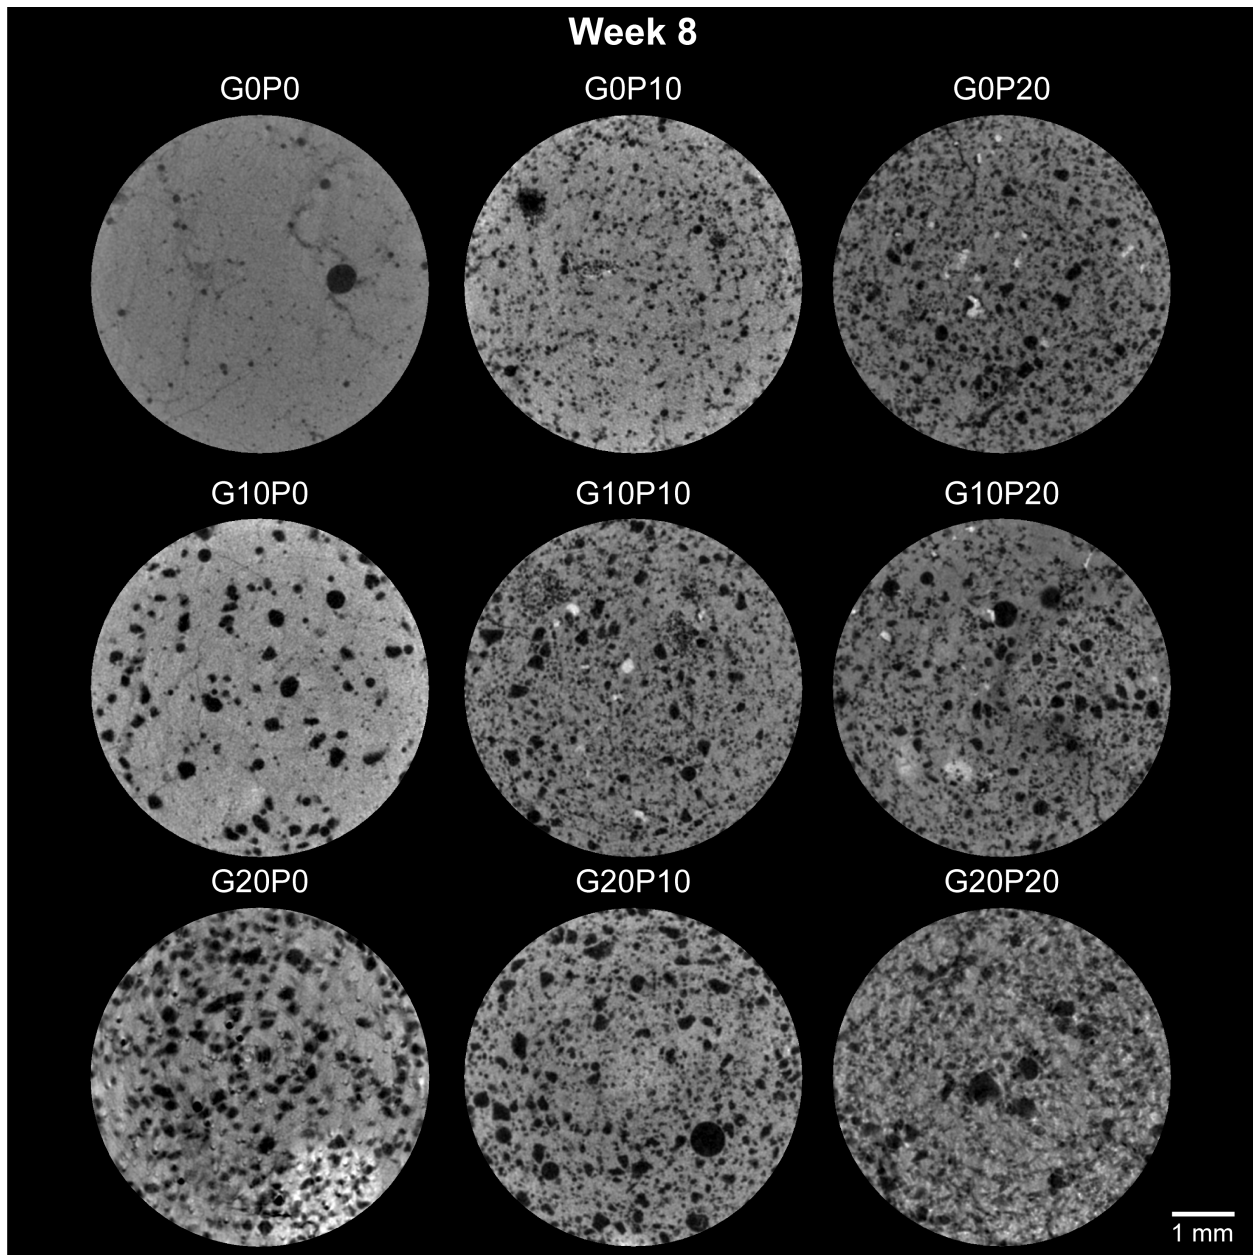

**Figure S4.** Representative  $\mu$ CT cross sections of GMP/PLGA/CPC composites after being leached for 3 days (A) and 8 weeks (B). Scale bar represents 1 mm.

Figure S5 A

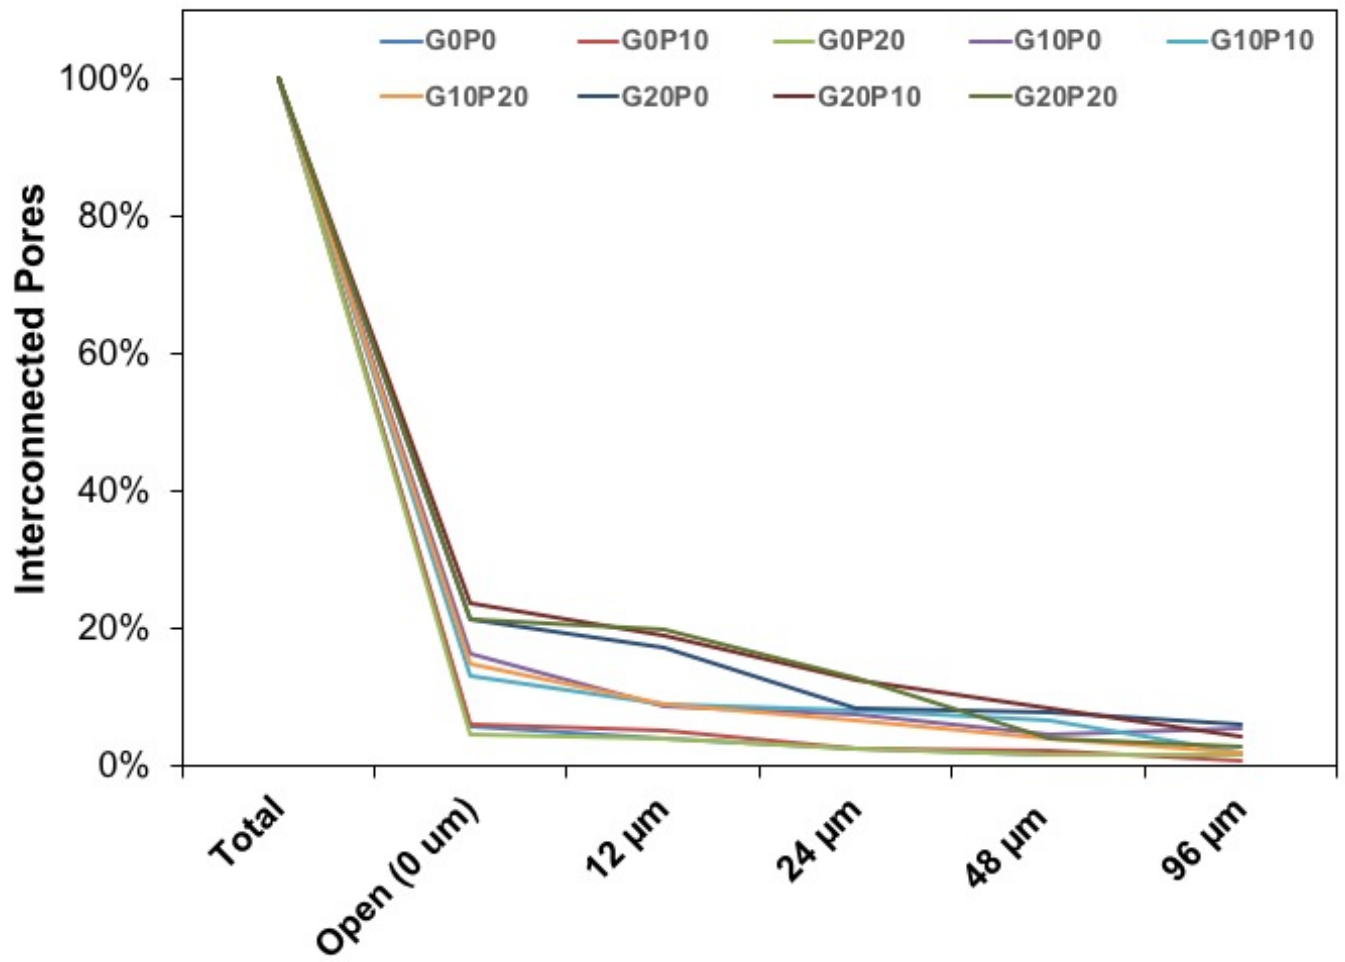

**Figure S5 B**

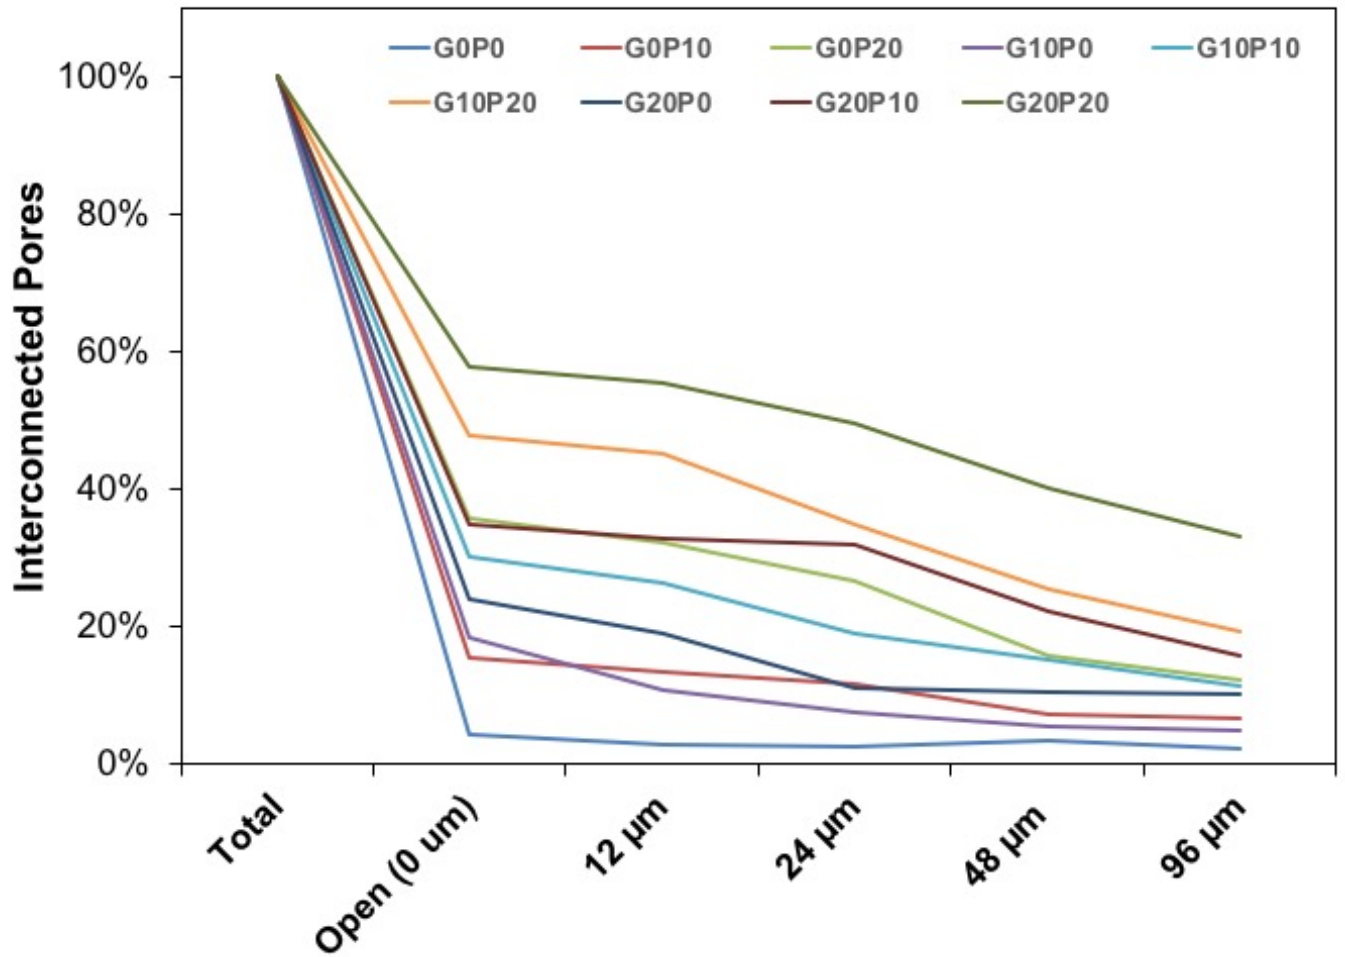

**Figure S5.** Representative pore interconnectivity of the GMP/PLGA/CPC composites after being leached for 3 days (A) and 8 wks (B). In both graphs, the percentage of porosity available to allow the penetration of an object of a given size is presented.



## Statistical Analysis

(Table S1) Mass Remaining Analysis (ANOVA)

### Fit Group

### Oneway Analysis of Mass Left By Group

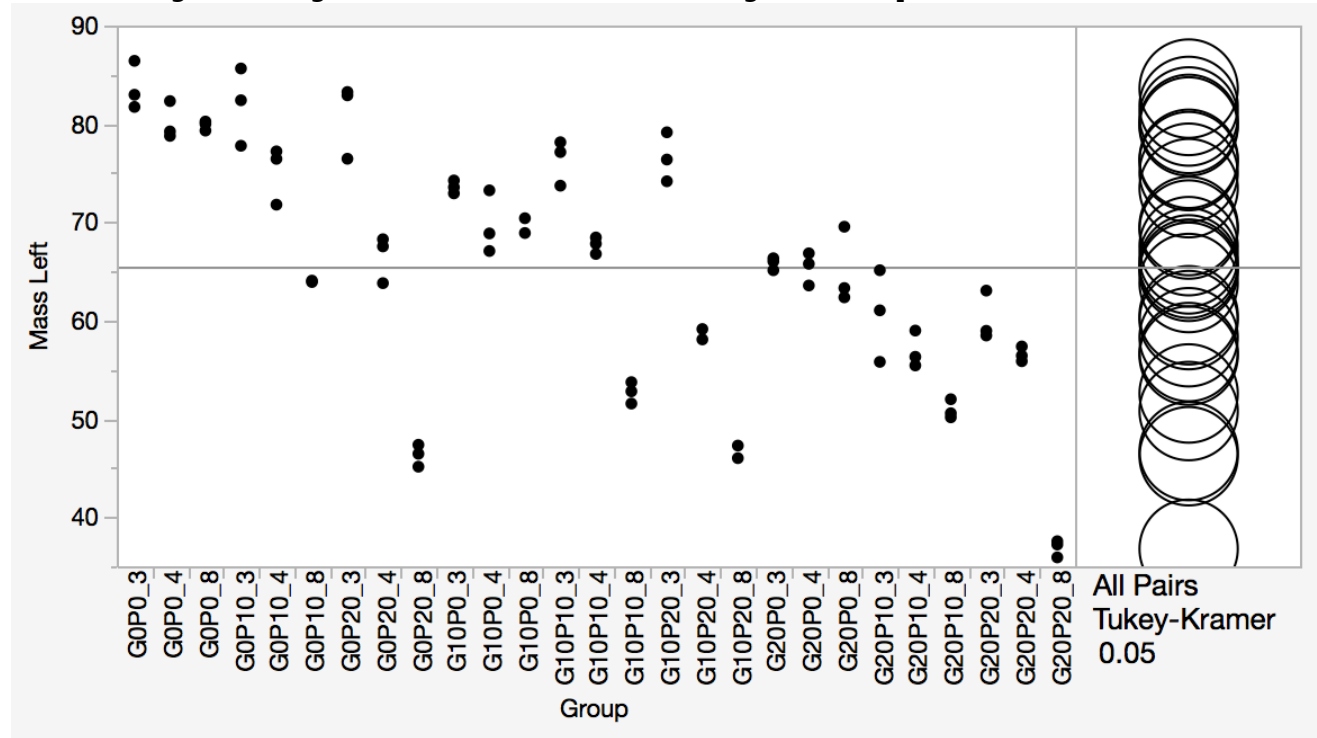

### Means Comparisons

Comparisons for all pairs using Tukey-Kramer HSD

Confidence Quantile

| q*      | Alpha |
|---------|-------|
| 3.89742 | 0.05  |

### Connecting Letters Report

| Level    |           | Mean      |
|----------|-----------|-----------|
| G0P0_3   | A         | 83.696667 |
| G0P10_3  | A B       | 81.933333 |
| G0P20_3  | A B       | 80.863333 |
| G0P0_4   | A B C     | 80.106690 |
| G0P0_8   | A B C     | 79.846965 |
| G10P20_3 | B C D     | 76.556667 |
| G10P10_3 | B C D E   | 76.323333 |
| G0P10_4  | B C D E   | 75.140923 |
| G10P0_3  | C D E F   | 73.573333 |
| G10P0_4  | D E F G   | 69.718951 |
| G10P0_8  | E F G     | 69.361799 |
| G10P10_4 | F G H     | 67.674635 |
| G0P20_4  | F G H I   | 66.531196 |
| G20P0_3  | G H I     | 65.816667 |
| G20P0_4  | G H I J   | 65.383789 |
| G20P0_8  | G H I J   | 65.062973 |
| G0P10_8  | G H I J K | 63.923890 |
| G20P10_3 | H I J K L | 60.643333 |
| G20P20_3 | I J K L   | 60.153333 |
| G10P20_4 | J K L M   | 58.410180 |
| G20P10_4 | K L M N   | 56.901966 |
| G20P20_4 | L M N     | 56.543057 |
| G10P10_8 | M N O     | 52.690039 |
| G20P10_8 | N O       | 50.901707 |
| G10P20_8 | O         | 46.831728 |
| G0P20_8  | O         | 46.309273 |
| G20P20_8 | P         | 36.886561 |

Levels not connected by same letter are significantly different.

(Table S2) Porosity Analysis (ANOVA)

### Oneway Analysis of Porosity By Group

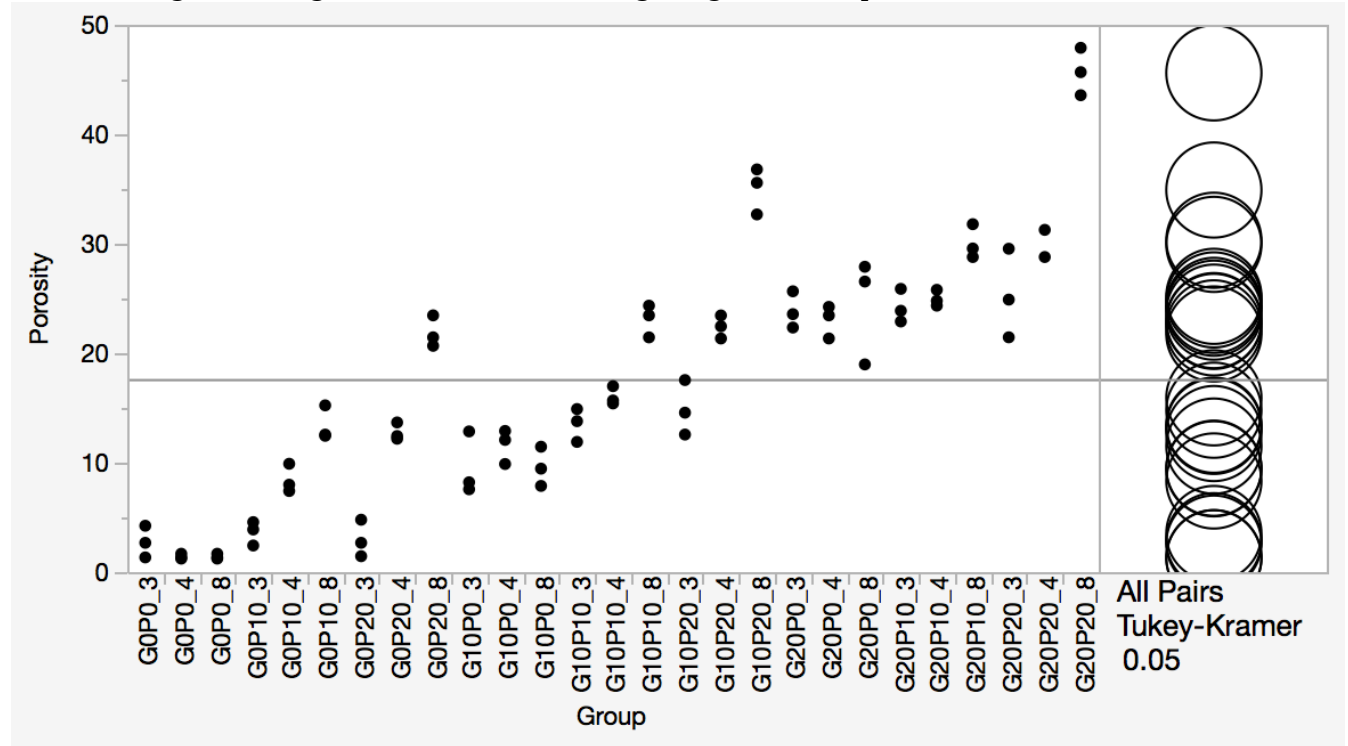

### Means Comparisons

Comparisons for all pairs using Tukey-Kramer HSD  
Confidence Quantile

| q*      | Alpha |
|---------|-------|
| 3.89742 | 0.05  |

## Connecting Letters Report

| Level    |       | Mean      |
|----------|-------|-----------|
| G20P20_8 | A     | 45.713000 |
| G10P20_8 | B     | 35.011333 |
| G20P20_4 | B C   | 30.419933 |
| G20P10_8 | B C D | 30.045567 |
| G20P20_3 | C D E | 25.296667 |
| G20P10_4 | C D E | 24.973189 |
| G20P0_8  | C D E | 24.473000 |
| G20P10_3 | D E   | 24.216333 |
| G20P0_3  | E     | 23.855467 |
| G10P10_8 | E     | 23.081000 |
| G20P0_4  | E     | 23.009756 |
| G10P20_4 | E     | 22.416244 |
| G0P20_8  | E F   | 21.860533 |
| G10P10_4 | F G   | 16.025233 |
| G10P20_3 | G H   | 14.893600 |
| G10P10_3 | G H I | 13.527867 |
| G0P10_8  | G H I | 13.417100 |
| G0P20_4  | G H I | 12.764244 |
| G10P0_4  | G H I | 11.618156 |
| G10P0_8  | H I J | 9.594833  |
| G10P0_3  | H I J | 9.543693  |
| G0P10_4  | I J K | 8.431644  |
| G0P10_3  | J K L | 3.631233  |
| G0P20_3  | K L   | 2.973200  |
| G0P0_3   | K L   | 2.753377  |
| G0P0_4   | L     | 1.420053  |
| G0P0_8   | L     | 1.420053  |

Levels not connected by same letter are significantly different.

(Table S3) Mean Pore Size Analysis (ANOVA)

### Oneway Analysis of Mean By Group

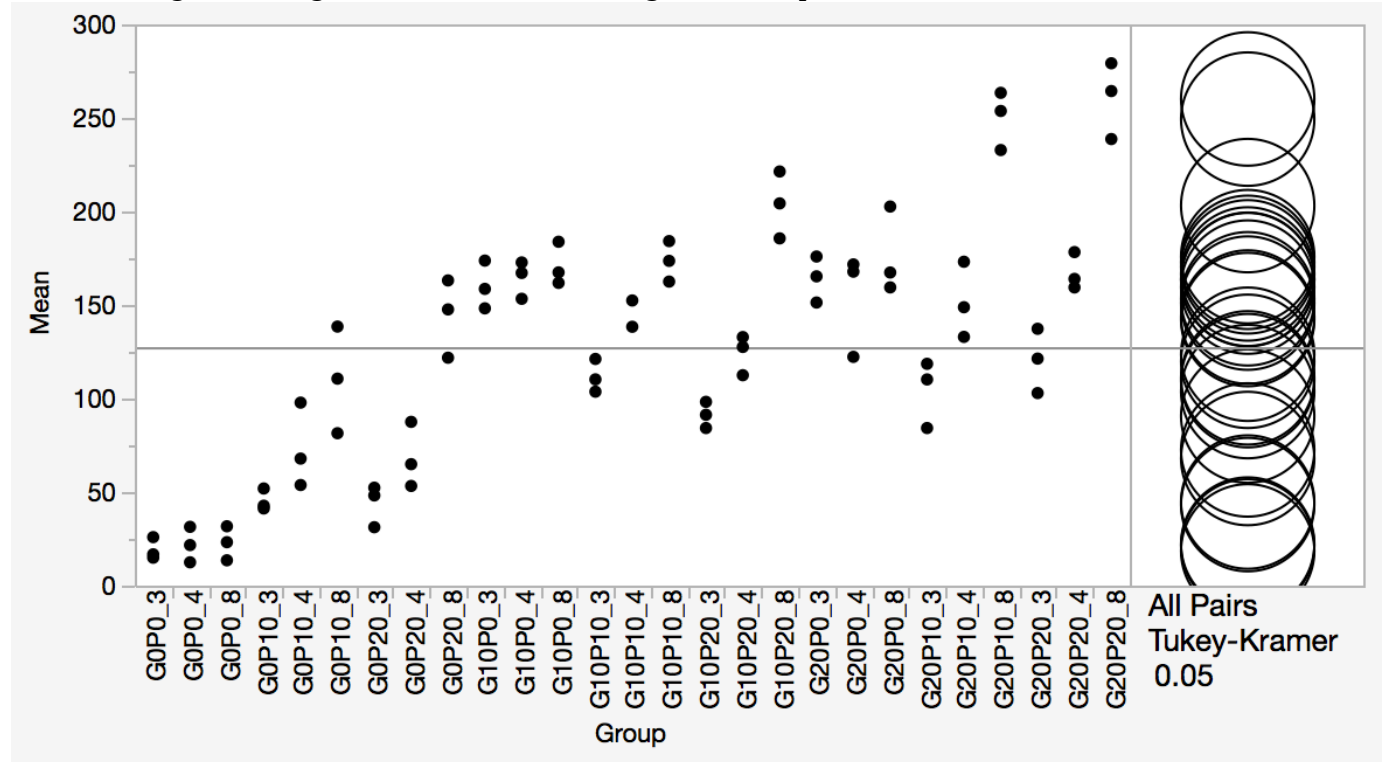

### Means Comparisons

Comparisons for all pairs using Tukey-Kramer HSD  
Confidence Quantile

| q*      | Alpha |
|---------|-------|
| 3.89742 | 0.05  |

### Connecting Letters Report

| Level               | Mean      |
|---------------------|-----------|
| G20P20_8 A          | 260.76000 |
| G20P10_8 A B        | 249.98667 |
| G10P20_8 B C        | 203.76000 |
| G20P0_8 C D         | 176.46667 |
| G10P10_8 C D E      | 173.42000 |
| G10P0_8 C D E       | 171.01667 |
| G20P20_4 C D E F    | 167.20333 |
| G10P0_4 C D E F     | 164.39333 |
| G20P0_3 C D E F     | 164.18000 |
| G10P0_3 C D E F G   | 160.18333 |
| G20P0_4 C D E F G H | 153.93000 |
| G20P10_4 D E F G H  | 151.63000 |
| G0P20_8 D E F G H   | 144.19667 |
| G10P10_4 D E F G H  | 142.83667 |
| G10P20_4 E F G H I  | 124.29667 |
| G20P20_3 F G H I J  | 120.51333 |
| G10P10_3 G H I J K  | 111.68667 |
| G0P10_8 G H I J K   | 110.18333 |
| G20P10_3 H I J K    | 104.33333 |
| G10P20_3 I J K L    | 91.25667  |
| G0P10_4 J K L M     | 73.15333  |
| G0P20_4 K L M N     | 68.57000  |
| G0P10_3 L M N       | 45.28667  |
| G0P20_3 L M N       | 43.92000  |
| G0P0_8 M N          | 22.82000  |
| G0P0_4 N            | 21.84333  |
| G0P0_3 N            | 19.18333  |

Levels not connected by same letter are significantly different.

(Table S4) Mode Pore Size Analysis (ANOVA)

### Oneway Analysis of Mode By Group

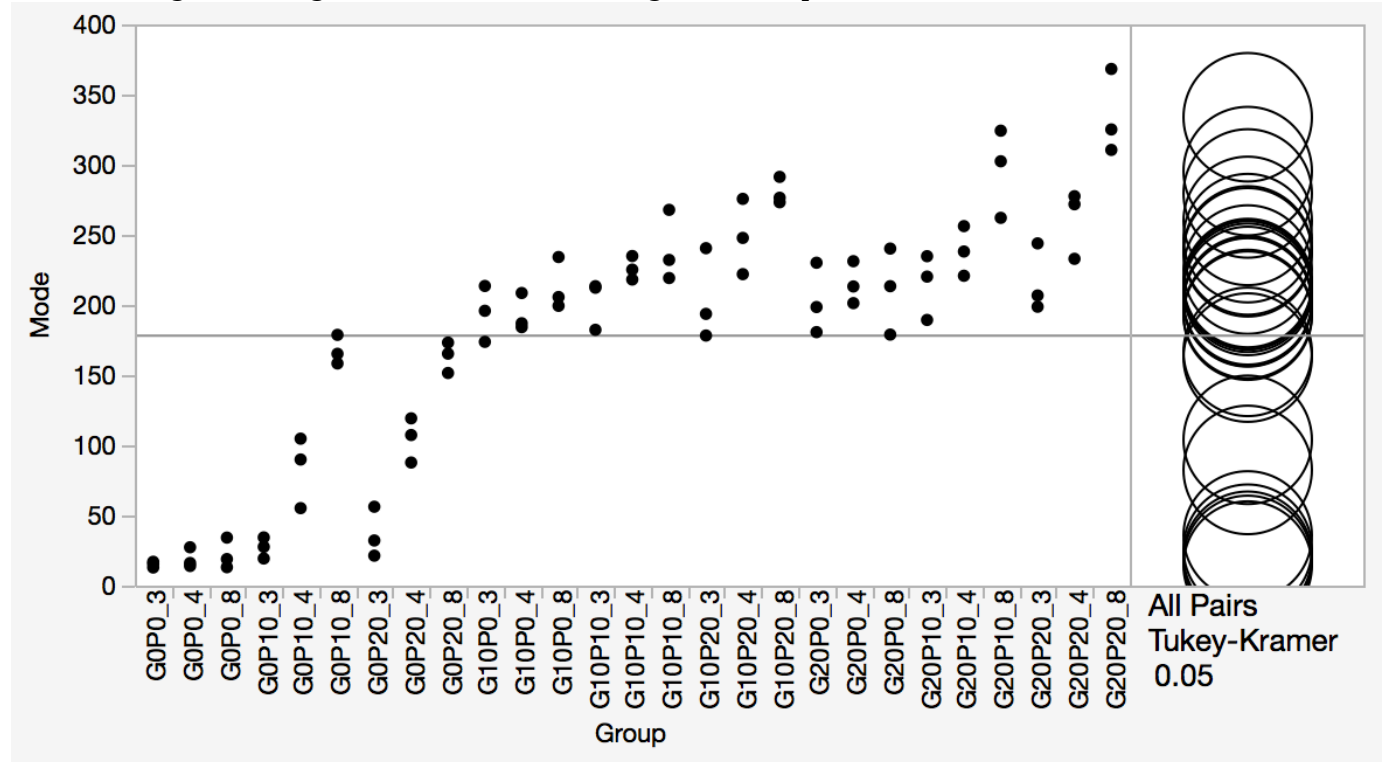

### Means Comparisons

Comparisons for all pairs using Tukey-Kramer HSD  
Confidence Quantile

| q*      | Alpha |
|---------|-------|
| 3.89742 | 0.05  |

## Connecting Letters Report

| Level            | Mean      |
|------------------|-----------|
| G20P20_8 A       | 334.63000 |
| G20P10_8 A B     | 296.26000 |
| G10P20_8 A B C   | 280.31667 |
| G20P20_4 B C D   | 260.75333 |
| G10P20_4 B C D E | 248.47667 |
| G10P10_8 B C D E | 239.71333 |
| G20P10_4 B C D E | 238.38667 |
| G10P10_4 C D E F | 226.09333 |
| G20P20_3 C D E F | 216.48333 |
| G20P0_4 D E F    | 215.24667 |
| G20P10_3 D E F   | 214.78333 |
| G10P0_8 D E F    | 213.08667 |
| G20P0_8 D E F    | 210.84333 |
| G10P20_3 D E F   | 204.13000 |
| G20P0_3 D E F    | 203.11000 |
| G10P10_3 D E F   | 202.67667 |
| G10P0_3 E F      | 194.39000 |
| G10P0_4 E F      | 193.24333 |
| G0P10_8 F G      | 167.42000 |
| G0P20_8 F G      | 163.35333 |
| G0P20_4 G H      | 104.75000 |
| G0P10_4 H I      | 83.27000  |
| G0P20_3 I J      | 36.57000  |
| G0P10_3 I J      | 27.11000  |
| G0P0_8 I J       | 22.08000  |
| G0P0_4 I J       | 19.14000  |
| G0P0_3 J         | 15.11000  |

Levels not connected by same letter are significantly different.



*(Table S5) Incubation Media pH Analysis (ANOVA)*

### Oneway Analysis of pH By Group

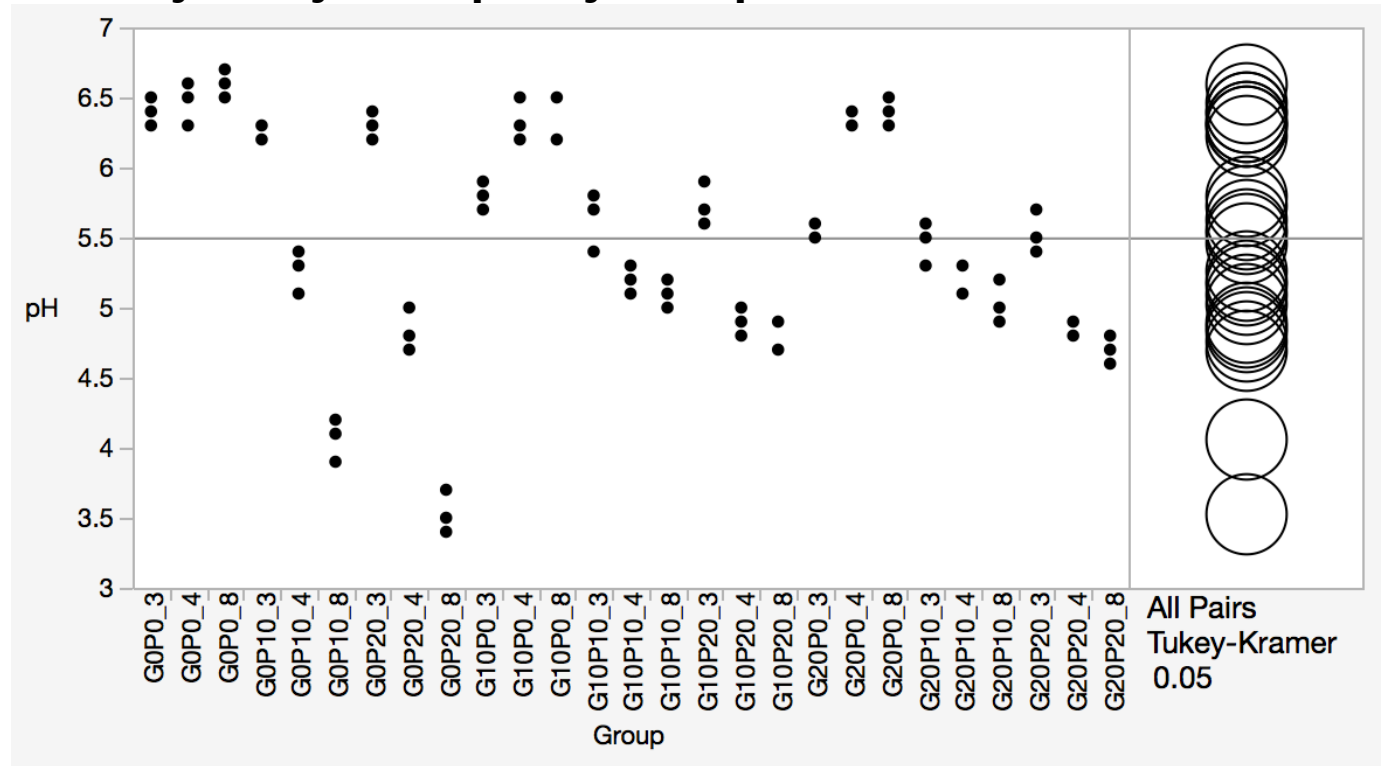

### Means Comparisons

Comparisons for all pairs using Tukey-Kramer HSD

Confidence Quantile

| q*      | Alpha |
|---------|-------|
| 3.89742 | 0.05  |

## Connecting Letters Report

| Level              | Mean      |
|--------------------|-----------|
| G0P0_8 A           | 6.6000000 |
| G0P0_4 A           | 6.4666667 |
| G0P0_3 A           | 6.4000000 |
| G20P0_8 A          | 6.4000000 |
| G10P0_4 A          | 6.3333333 |
| G20P0_4 A          | 6.3333333 |
| G0P20_3 A          | 6.3000000 |
| G10P0_8 A          | 6.3000000 |
| G0P10_3 A          | 6.2333333 |
| G10P0_3 B          | 5.8000000 |
| G10P20_3 B         | 5.7333333 |
| G10P10_3 B C       | 5.6333333 |
| G20P0_3 B C D      | 5.5666667 |
| G20P20_3 B C D     | 5.5333333 |
| G20P10_3 B C D E   | 5.4666667 |
| G0P10_4 C D E F    | 5.2666667 |
| G10P10_4 D E F G   | 5.2000000 |
| G20P10_4 D E F G H | 5.1666667 |
| G10P10_8 E F G H I | 5.1000000 |
| G20P10_8 F G H I   | 5.0333333 |
| G10P20_4 F G H I   | 4.9000000 |
| G20P20_4 F G H I   | 4.8666667 |
| G0P20_4 G H I      | 4.8333333 |
| G10P20_8 H I       | 4.7666667 |
| G20P20_8 I         | 4.7000000 |
| G0P10_8 J          | 4.0666667 |
| G0P20_8 K          | 3.5333333 |

Levels not connected by same letter are significantly different.
